# Supplementary material for: Ultrathin 2D nitrogen-doped carbon nanosheets for high performance supercapacitors: insight into the effects of graphene oxides
Source: Royal Society of Chemistry journal article supplement (doi:10.1039/c9nr01290g), 2019-01-01
Supplement: c9nr01290g1.pdf [file c9nr01290g1.pdf]

# Ultrathin 2D nitrogen-doped carbon nanosheets for high performance supercapacitors: insight into the effects of graphene oxides

*Xu Zhang<sup>a\*</sup>, Qiuyu Fan<sup>a</sup>, Ning Qu<sup>a</sup>, He Yang<sup>a</sup>, Man Wang<sup>b</sup>, Anmin Liu<sup>a\*</sup>, and Juan Yang<sup>b\*</sup>*

<sup>a</sup>State Key Laboratory of Fine Chemicals, School of Petroleum and Chemical Engineering, Dalian University of Technology, Panjin 124221, China

<sup>b</sup>School of Chemical Engineering and Technology, Xi'an Jiaotong University, Xi'an 710049, China.

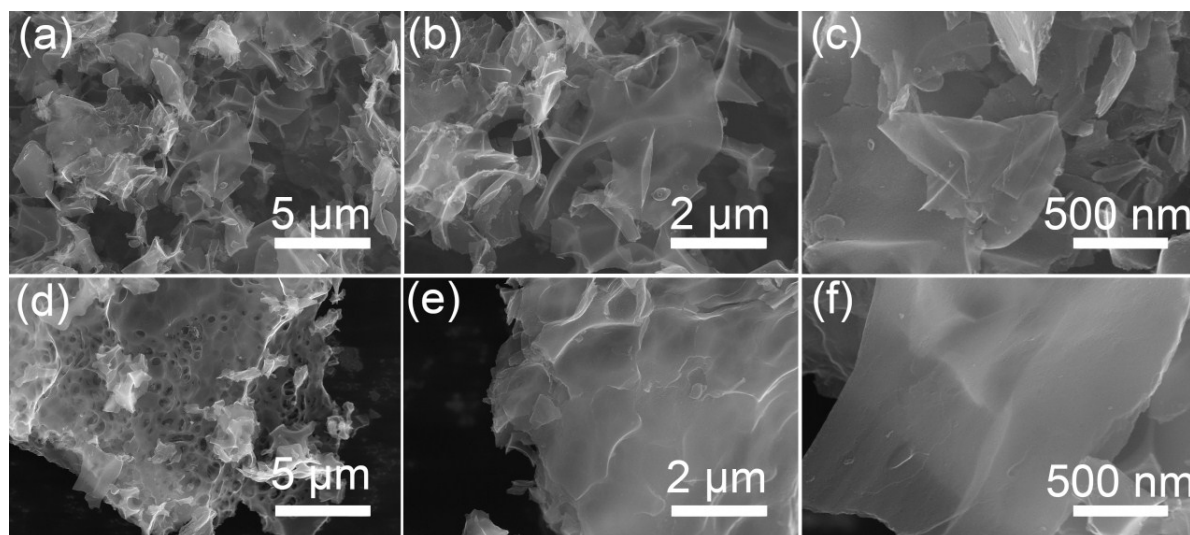

**Figure S1.** SEM images of the as-made (a-c) NCNS-1 and (d-f) NCNS-5.

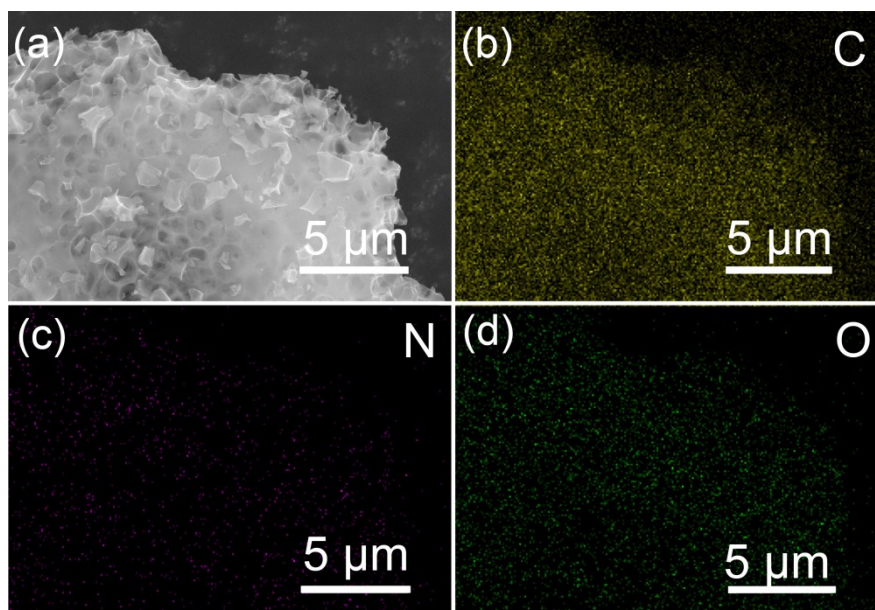

**Figure S2.** SEM image of the (a) NCNS-3 and (b-d) the corresponding elemental mapping images of C, O, N from the image.

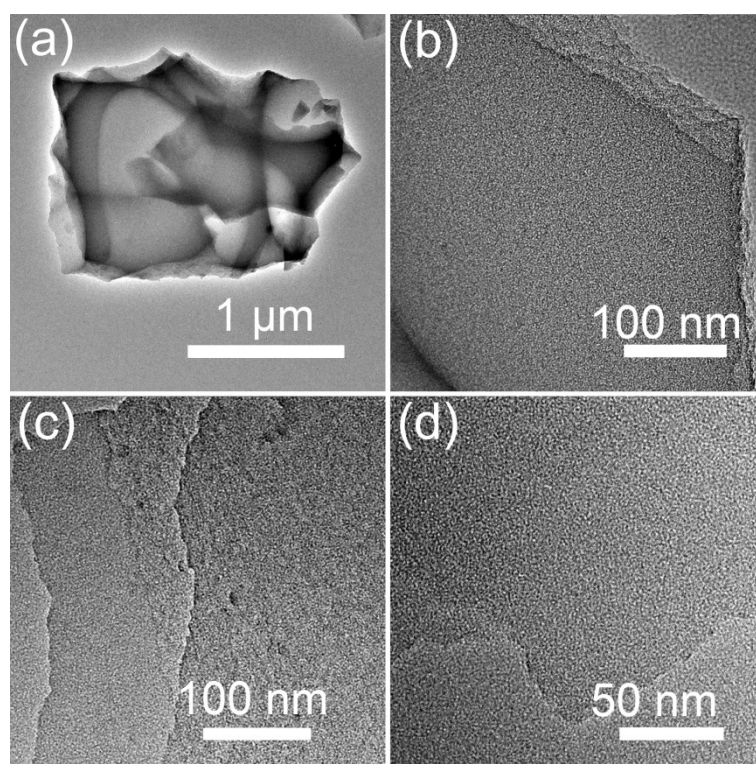

**Figure S3.** TEM images of (a) NC and (b-d) the as-made NCNS-3 under different magnifications.

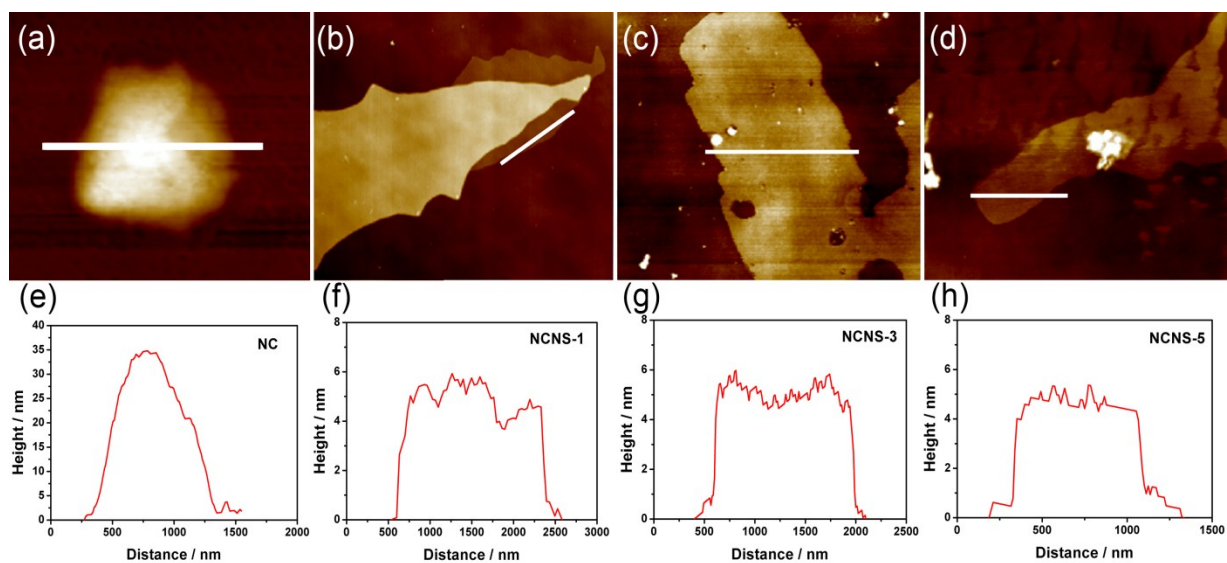

**Figure S4.** AFM images and corresponding height images of NCNSs: (a, e) NC; (b, f) NCNS-1; (c, g) NCNS-3; (d, h) NCNS-5.

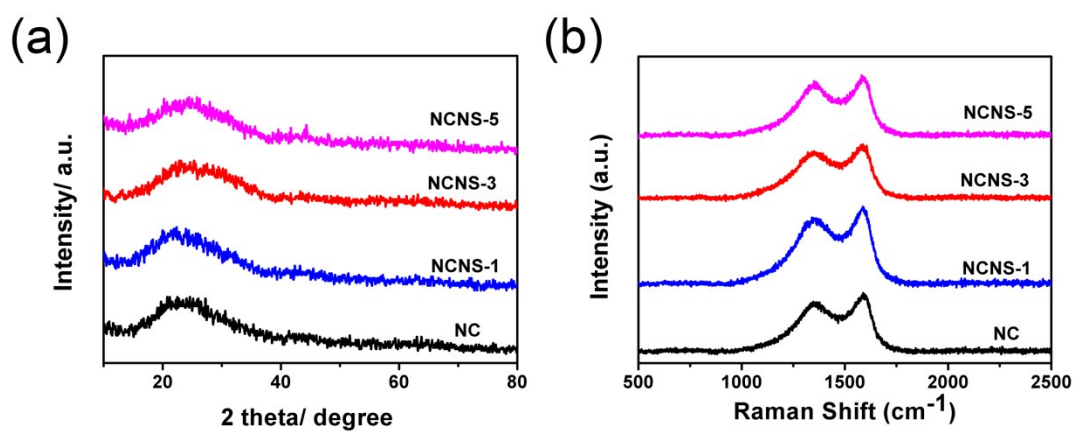

**Figure S5.** (a) XRD patterns and (b) Raman spectra of the as-made NC and NCNSs samples.

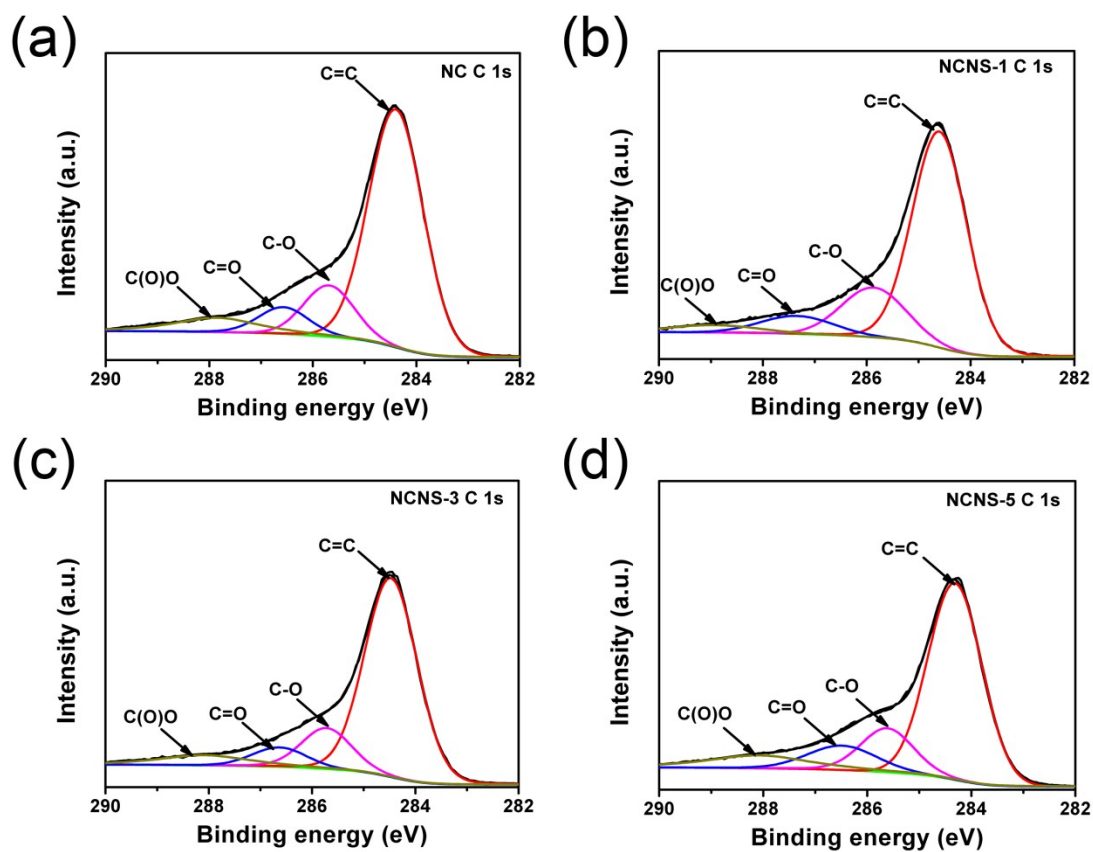

**Figure S6.** High-resolution XPS C1s spectra of the (a) NC; (b) NCNS-1; (c) NCNS-3; (d) NCNS-5.

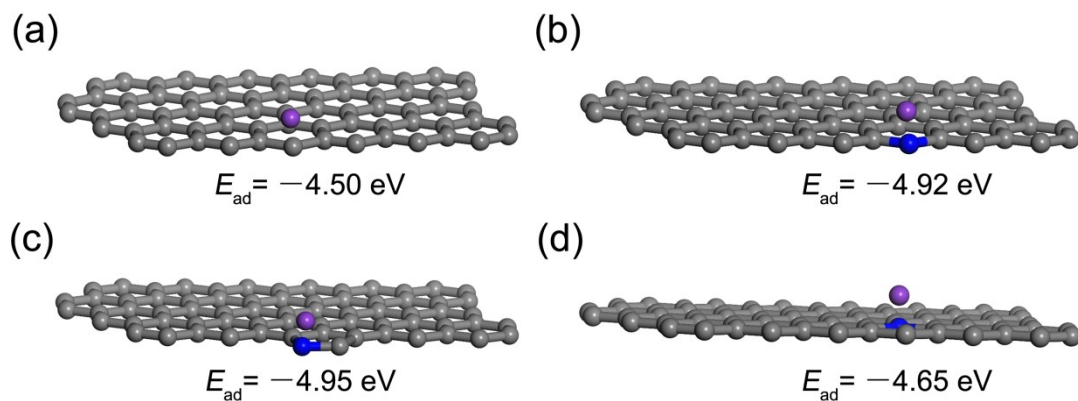

**Figure S7.** Optimized K<sup>+</sup>-bound structures and binding energies on different N-doped carbon configurations: (a) pure carbon, (b) pyridinic-N, (c) pyrrolic-N, (d) graphitic-N.



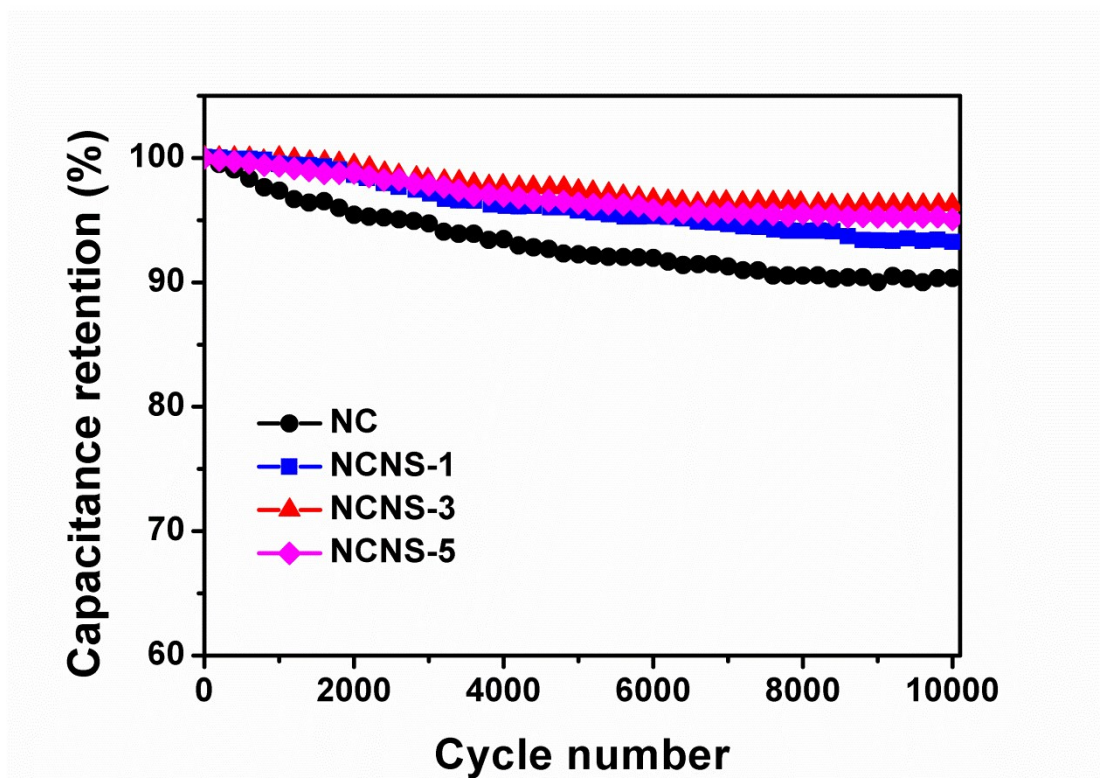

Figure S8. Capacitance retentions of NC and NCNSs measured at  $10 \text{ A g}^{-1}$

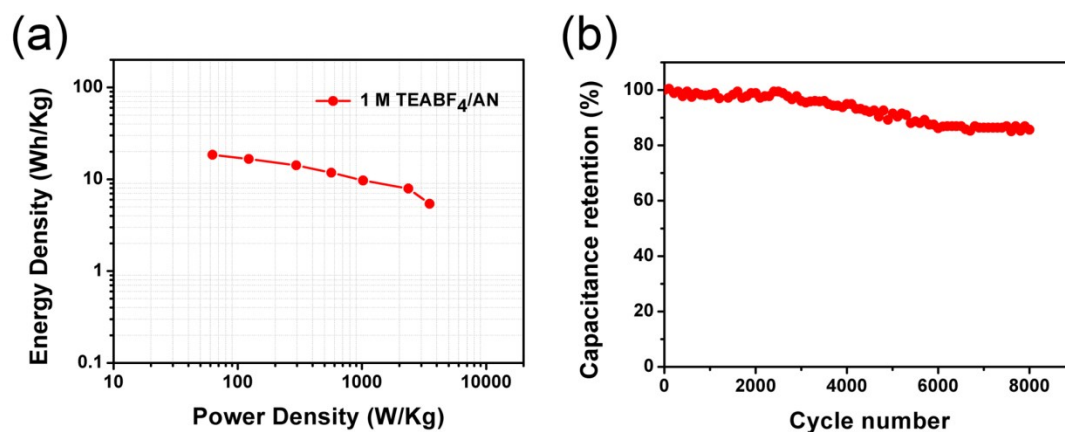

Figure S9. (a) Ragone plots of NCNS-3 measured in  $1\text{M TEABF}_4/\text{AN}$  electrolyte in the two-electrode cell. (b) Capacitance retention of NCNS-3 measured at  $4 \text{ A g}^{-1}$  in  $1\text{M TEABF}_4/\text{AN}$  electrolyte in the two-electrode cell.
